# Supplementary material
Source: PubMed Central journal article supplement (PMC3246036)
Supplement: NIHMS327801-supplement-01.pdf [file NIHMS327801-supplement-01.pdf]

**Supplementary Table 1.** Raw pCREB- and CREB-positive cell counts for all brain regions included in IHC analysis. Data expressed as number of positive cells per square-millimeter (mean  $\pm$  SEM).

*Raw pCREB-positive cell counts*

| Group | mPFC                   |                      | NAc              |                  | BLA              |
|-------|------------------------|----------------------|------------------|------------------|------------------|
|       | PL                     | IL                   | Shell            | Core             |                  |
| PNE   | 198.0 $\pm$ 22.8 (*,#) | 158.8 $\pm$ 15.5 (*) | 224.1 $\pm$ 23.1 | 158.6 $\pm$ 18.9 | 490.6 $\pm$ 41.4 |
| PE    | 108.2 $\pm$ 13.7       | 98.3 $\pm$ 14.3      | 193.0 $\pm$ 21.9 | 144.1 $\pm$ 19.8 | 438.5 $\pm$ 54.8 |
| UNE   | 118.0 $\pm$ 11.1       | 112.3 $\pm$ 16.1     | 179.8 $\pm$ 27.5 | 138.4 $\pm$ 13.1 | 449.0 $\pm$ 38.9 |
| UE    | 139.6 $\pm$ 12.3       | 118.6 $\pm$ 12.0     | 179.8 $\pm$ 27.5 | 193.7 $\pm$ 25.1 | 474.9 $\pm$ 33.6 |

*Raw CREB-positive cell counts*

| Group | mPFC               |                    | NAc                |                    | BLA                |
|-------|--------------------|--------------------|--------------------|--------------------|--------------------|
|       | PL                 | IL                 | Shell              | Core               |                    |
| PNE   | 3057.0 $\pm$ 97.7  | 3538.5 $\pm$ 120.0 | 3857.2 $\pm$ 140.0 | 3211.0 $\pm$ 115.3 | 2018.2 $\pm$ 144.1 |
| PE    | 3479.2 $\pm$ 121.1 | 3727.0 $\pm$ 139.6 | 3603.6 $\pm$ 115.1 | 3413.9 $\pm$ 188.4 | 2058.1 $\pm$ 130.8 |
| UNE   | 3307.0 $\pm$ 132.7 | 3636.9 $\pm$ 138.3 | 3561.8 $\pm$ 126.9 | 3199.0 $\pm$ 128.5 | 1921.1 $\pm$ 138.5 |
| UE    | 3159.8 $\pm$ 109.5 | 3697.8 $\pm$ 150.5 | 3736.9 $\pm$ 96.9  | 3302.1 $\pm$ 120.8 | 2044.7 $\pm$ 121.3 |

Significant differences between PNE and PE (\*) and PNE and UNE (#) as determined by Bonferroni-corrected post-hoc comparisons ( $p < .05$ ).
